# Supplementary material for: Piecing Arterial Branching Pattern Together from Non-Contrast and Angiographic Brain Computed Tomography before Endovascular Thrombectomy for Acute Ischemic Stroke
Source: MDPI journal article supplement (doi:10.3390/jcm12124051), 2023-06-14
Supplement: s1 [file s1]

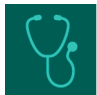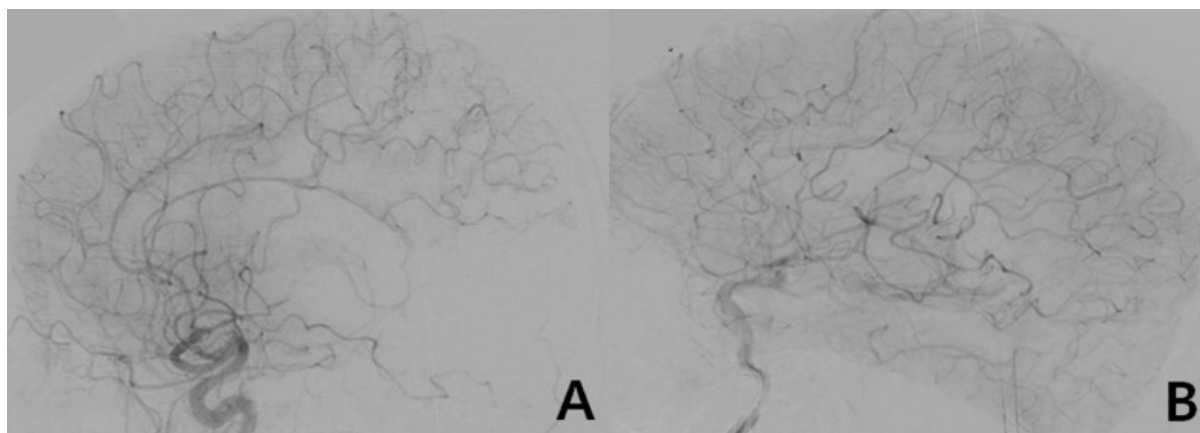

**Supplementary Figure S1.** Collateral grading in DSA. (A) A 52-year-old male with left MCA M2 occlusion with poor collateral. (B) An 85-year-old male with right MCA M2 occlusion with good collateral. DSA, digital subtraction angiography; MCA, middle cerebral artery.

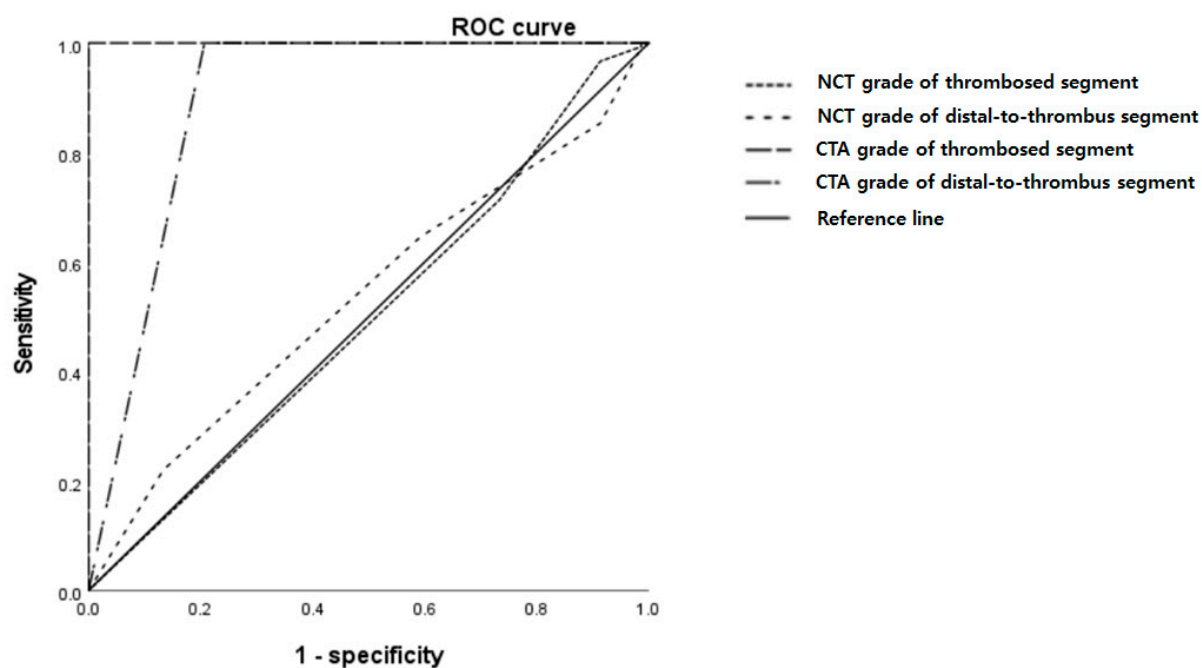

**Supplementary Figure S2.** NCT and CTA performance to detect the occlusion side. The AUC of the CTA grade of thrombosed segment and that of distal-to-thrombus segment was 1.00 and 0.897, respectively. The AUC of the NCT grade of thrombosed segment and that of distal-to-thrombus segment was 0.498 and 0.535, respectively. AUC, area under curve; NCT, non-contrast computed tomography; CTA, computed tomographic angiography.

Supplementary Table S1: Definition of arterial visualization grade

| Arterial Visualization Grade | Definition                                                                                                                                                       |
|------------------------------|------------------------------------------------------------------------------------------------------------------------------------------------------------------|
| 1                            | The vessel course is completely unpredictable                                                                                                                    |
| 2                            | The vessel course is poorly predicted. e.g., only a small portion of the M2 segment of MCA is seen                                                               |
| 3                            | The vessel course is partially predicted. e.g., only one branch of the M2 segment of MCA is seen completely, or just a small portion of all MCA branches is seen |
| 4                            | The vessel course is predicted well. e.g., one branch of the M2 segment of MCA is fully visible and just a small portion of the other branches are predicted     |
| 5                            | The vessel course is predicted very well or all M2 segments of the MCA are predicted                                                                             |

MCA, middle cerebral artery

Supplementary Table S2: Definition of collateral score

| Collateral Score | Definition                                                                   |
|------------------|------------------------------------------------------------------------------|
| 0                | No collateral flow to the ischemic area                                      |
| 1                | Slow collateral flow to ischemic regions with persistent perfusion defect    |
| 2                | Fast collateral flow to ischemic regions with persistent perfusion defect    |
| 3                | Slow collateral flow to ischemic regions without persistent perfusion defect |
| 4                | Fast collateral flow to ischemic regions without persistent perfusion defect |

Supplementary Table S3: Arterial visualization grading improvements after combined interpretation of NCT and CTA

| NCT grade of distal-to-thrombus<br>segment | CTA grade of distal-to-<br>thrombus segment | Visualization grade after<br>comprehensive reading | N (%)     |
|--------------------------------------------|---------------------------------------------|----------------------------------------------------|-----------|
| 3                                          | 2                                           | 4                                                  | 1 (5.9)   |
| 3                                          | 3                                           | 4                                                  | 10 (58.8) |
| 3                                          | 3                                           | 5                                                  | 1 (5.9)   |
| 4                                          | 4                                           | 5                                                  | 5 (29.4)  |

NCT, non-contrast computed tomography; CTA, computed tomography angiography; N, number
